# Supplementary material
Source: PubMed Central journal article supplement (PMC4741043)

## **APPENDICES**

**Supplemental Table S1:** Characteristics of study cohort versus recipients of deceased donor kidney transplants nationally during the same time period

| <b>Variable</b>                |         | <b>Study cohort<br/>N=557</b> | <b>National Population<br/>N=38,517</b> |
|--------------------------------|---------|-------------------------------|-----------------------------------------|
| <b>Age [IQR]</b>               |         | 55 [46-63]                    | 53 [43-62]                              |
| <b>Gender Male (%)</b>         |         | 351 (63%)                     | 23299 (60%)                             |
| <b>African American (%)</b>    | Yes     | 261 (47%)                     | 12148 (32%)                             |
|                                | No      | 296 (53%)                     | 26369 (68%)                             |
| <b>Panel reactive antibody</b> | 0%      | 363 (65%)                     | 23702 (62%)                             |
|                                | 1-10%   | 27 (5%)                       | 1908 (5%)                               |
|                                | 11-80%  | 86 (15%)                      | 7299 (19%)                              |
|                                | >80%    | 81 (15%)                      | 5608 (15%)                              |
| <b>Prior transplant</b>        | No      | 470 (85%)                     | 33509 (87%)                             |
|                                | Yes     | 85 (15%)                      | 5008 (13%)                              |
|                                | Unknown | 1 (0%)                        |                                         |

**Supplemental Table S2:** Common indications and frequency of dialysis within 1 week of transplantation

|                                                            | <b>Total</b> | <b>Captured by<br/>OPTN</b> | <b>Not documented in<br/>OPTN</b> |
|------------------------------------------------------------|--------------|-----------------------------|-----------------------------------|
| <b>Dialysis indication for patients dialyzed only once</b> |              |                             |                                   |
| Hyperkalemia                                               | 39           | 30                          | 9                                 |
| Uremia (high BUN and/or Creatinine)                        | 33           | 27                          | 6                                 |
| Volume overload                                            | 3            | 3                           | 0                                 |
| Acidosis                                                   | 1            | 0                           | 1                                 |
| Not described                                              | 0            | -                           | -                                 |
| Dialyzed once, on post-transplant Day 1                    | 45           | 32                          | 13                                |
| Dialyzed once, after post-transplant Day 1                 | 31           | 28                          | 3                                 |
| Multiple dialysis sessions                                 | 138          | 131                         | 7                                 |

**Supplementary Table S3:** Comparison of delayed graft function events identified in the Deceased Donor Study to events recorded in the OPTN database, excluding Harper University Hospital.

| UNOS         | DDR |     | Total |
|--------------|-----|-----|-------|
|              | Yes | No  |       |
| Yes          | 174 | 6   | 180   |
| No           | 23  | 324 | 347   |
| <b>Total</b> | 197 | 330 | 527   |

|                                  | Estimate (95% CI) |
|----------------------------------|-------------------|
| <b>Sensitivity</b>               | 88% (83% to 92%)  |
| <b>Specificity</b>               | 98% (96% to 99%)  |
| <b>Positive Predictive Value</b> | 97% (93% to 98%)  |
| <b>Negative Predictive Value</b> | 93% (90% to 96%)  |

**Supplementary Table S4:** Comparison of 6-month serum creatinine values collected for the Deceased Donor Study to creatinine values recorded in the OPTN database, excluding Harper University Hospital \*

| <b>Label</b>                  | <b>N</b> | <b>Mean</b> | <b>SD</b> |
|-------------------------------|----------|-------------|-----------|
| DDS 6-month Serum Creatinine  | 463      | 1.56        | 0.63      |
| OPTN 6-month Serum Creatinine | 461      | 1.53        | 0.62      |

\* Lin's concordance correlation  $r_c=0.92$  (95% CI, 0.90 to 0.93)

**Supplementary Table S5:** Comparison of acute rejection within 6-months of deceased donor kidney transplantation collected for the Deceased Donor Study to rejection recorded in the OPTN database, excluding Harper University Hospital

| OPTN  | DDS |     | Total |
|-------|-----|-----|-------|
|       | Yes | No  |       |
| Yes   | 17  | 2   | 19    |
| No    | 27  | 413 | 440   |
| Total | 44  | 415 | 459   |

|                           | Estimate (95% CI)  |
|---------------------------|--------------------|
| Sensitivity               | 39% (13% to 73%)   |
| Specificity               | 100% (99% to 100%) |
| Positive Predictive Value | 89% (79% to 95%)   |
| Negative Predictive Value | 94% (89% to 97%)   |

**Supplemental Figure S1:** Bland-Altman plot comparing 6-month serum creatinine values collected for the Deceased Donor Study to creatinine values recorded in the OPTN database

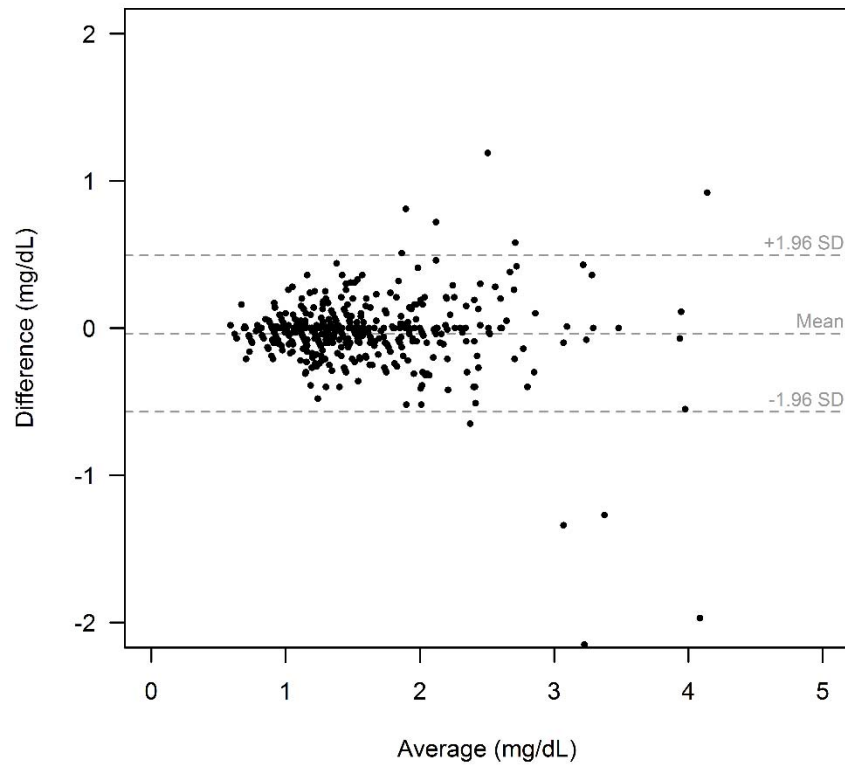

Supplement: CJN.06950615_CJN06950615SupplementaryData.pdf [file CJN.06950615_CJN06950615SupplementaryData.pdf]
